# Supplementary material
Source: publisher figshare collection journal article supplement (https://acs.figshare.com/ndownloader/files/4173415)
Supplement: Supplementary file 1 [file 4173415]

## **Supplementary Data**

### **Label-free Fluorescent Detection of Ions, Proteins and Small Molecules Using Structure-Switching Aptamers, SYBR Gold and Exonuclease I**

Dongmei Zheng<sup>†</sup>, Ruxing Zou<sup>†</sup>, Xinhui Lou<sup>†\*</sup>

Department of Chemistry, Capital Normal University, Xisanhuan North Rd. 105,  
Beijing, China, 100084.

<sup>†</sup> Authors contributed equally to this work.

\* To whom correspondence should be addressed to

xlou9999@yahoo.com

Tel: +86-10-68902491 ext. 808

Fax: +86-10-68902320

**Table S-1. Potassium detection under different assay conditions.**

| Sample           | Incubation time | Enzymatic reaction time<br>(37°C) | $(F-F^0)/F^0$ |
|------------------|-----------------|-----------------------------------|---------------|
| original assay   | 20°C, 12 hr     | 40 min                            | 0.73          |
| modified assay 1 | 20°C, 1 hr      | 40 min                            | 0.41          |
| modified assay 2 | 20°C, 1 hr      | 10 min                            | 0.59          |
| modified assay 3 | 4°C, 15 min     | 40 min                            | 0.49          |
| modified assay 4 | 4°C, 15 min     | 10 min                            | 0.43          |

For blank sample,  $(F-F^0)/F^0=0$

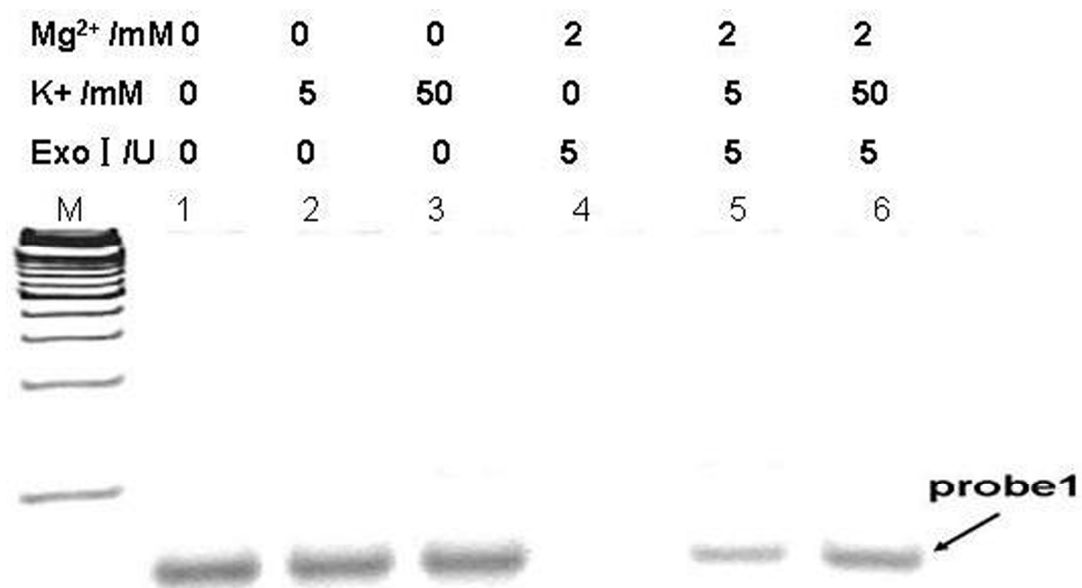

**Figure S-1.** PAGE image to show the increased resistance of probe 1 to Exo I digestion as the increases of the K<sup>+</sup> concentrations. 20% native PAGE gel was run under 70 V for 90 minutes.

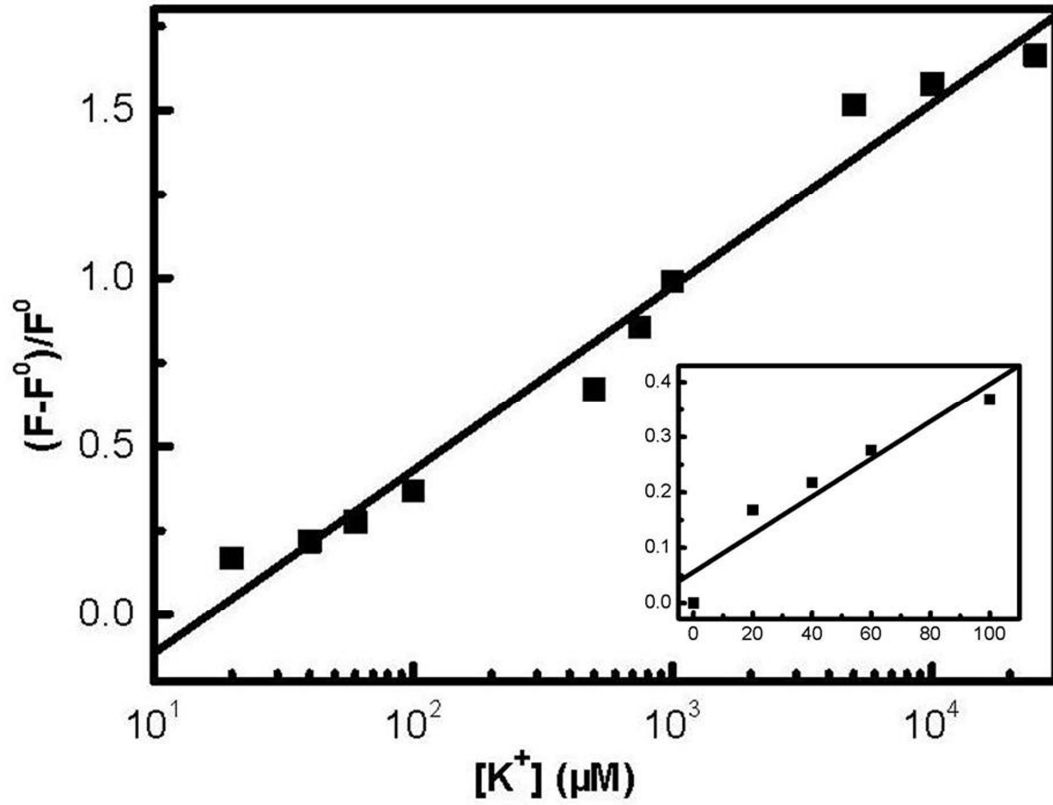

**Figure S-2.** Relative fluorescence intensities  $(F-F^0)/F^0$  of the SYBR Gold/probe 1 mixture upon addition of different concentrations of  $K^+$ .  $F^0$  and  $F$  stand for the fluorescent intensity in the absence and presence of potassium ions. The incubation time before adding Exo I and SYBR gold was 1 hr. All other assay conditions were as same as those described in the main text for  $K^+$  detection.

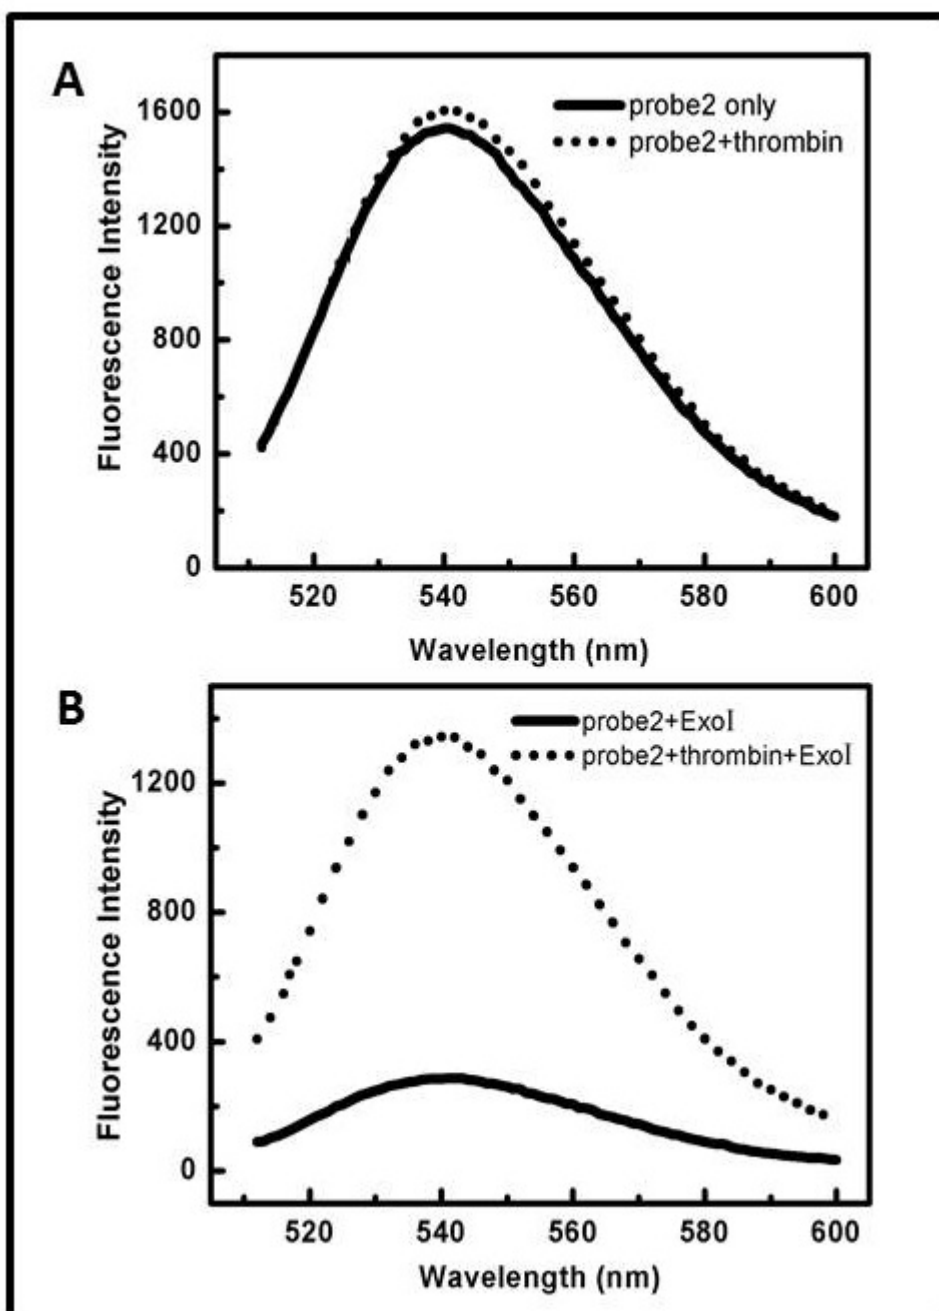

**Figure S-3.** General applicability of the detection strategy for thrombin detection: The fluorescence spectra of SYBR Gold/probe 2 mixture with or without 1  $\mu$ M thrombin, without (A) or with (B) the Exo I digestion involved.

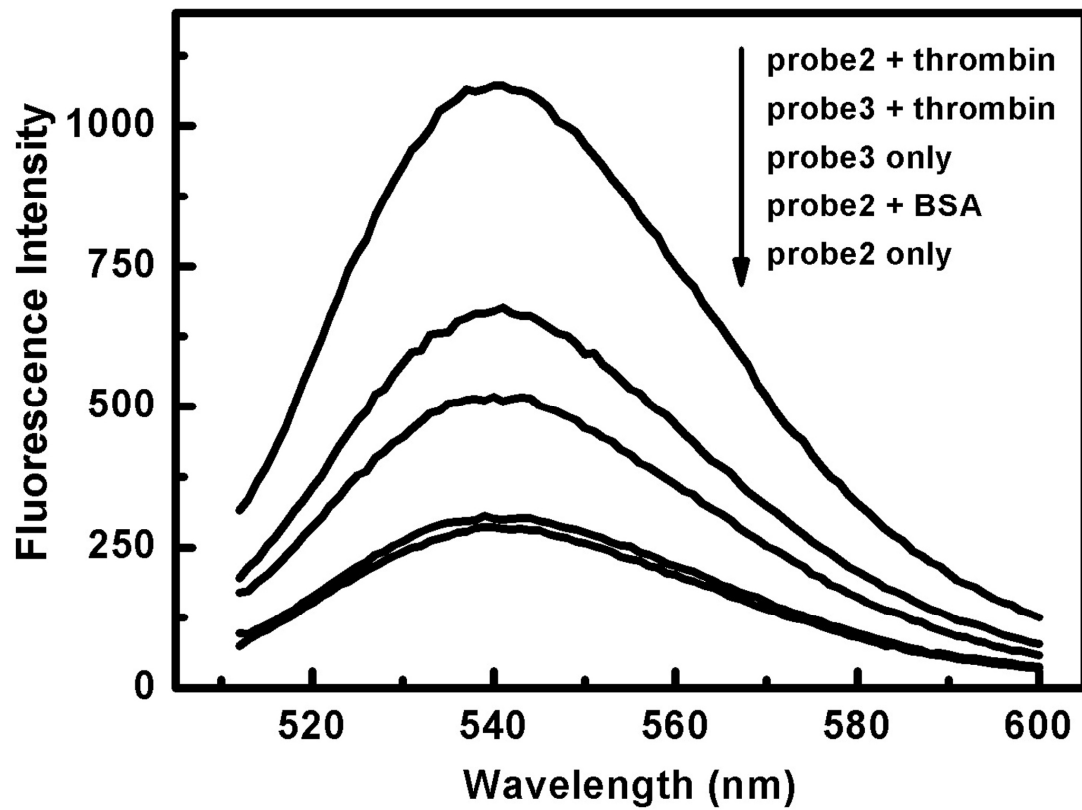

**Figure S-4.** The fluorescence spectra from solutions containing SYBR Gold, Exo I, different targets, and different probes. All assay conditions were as same as those described in the main text for thrombin detection.

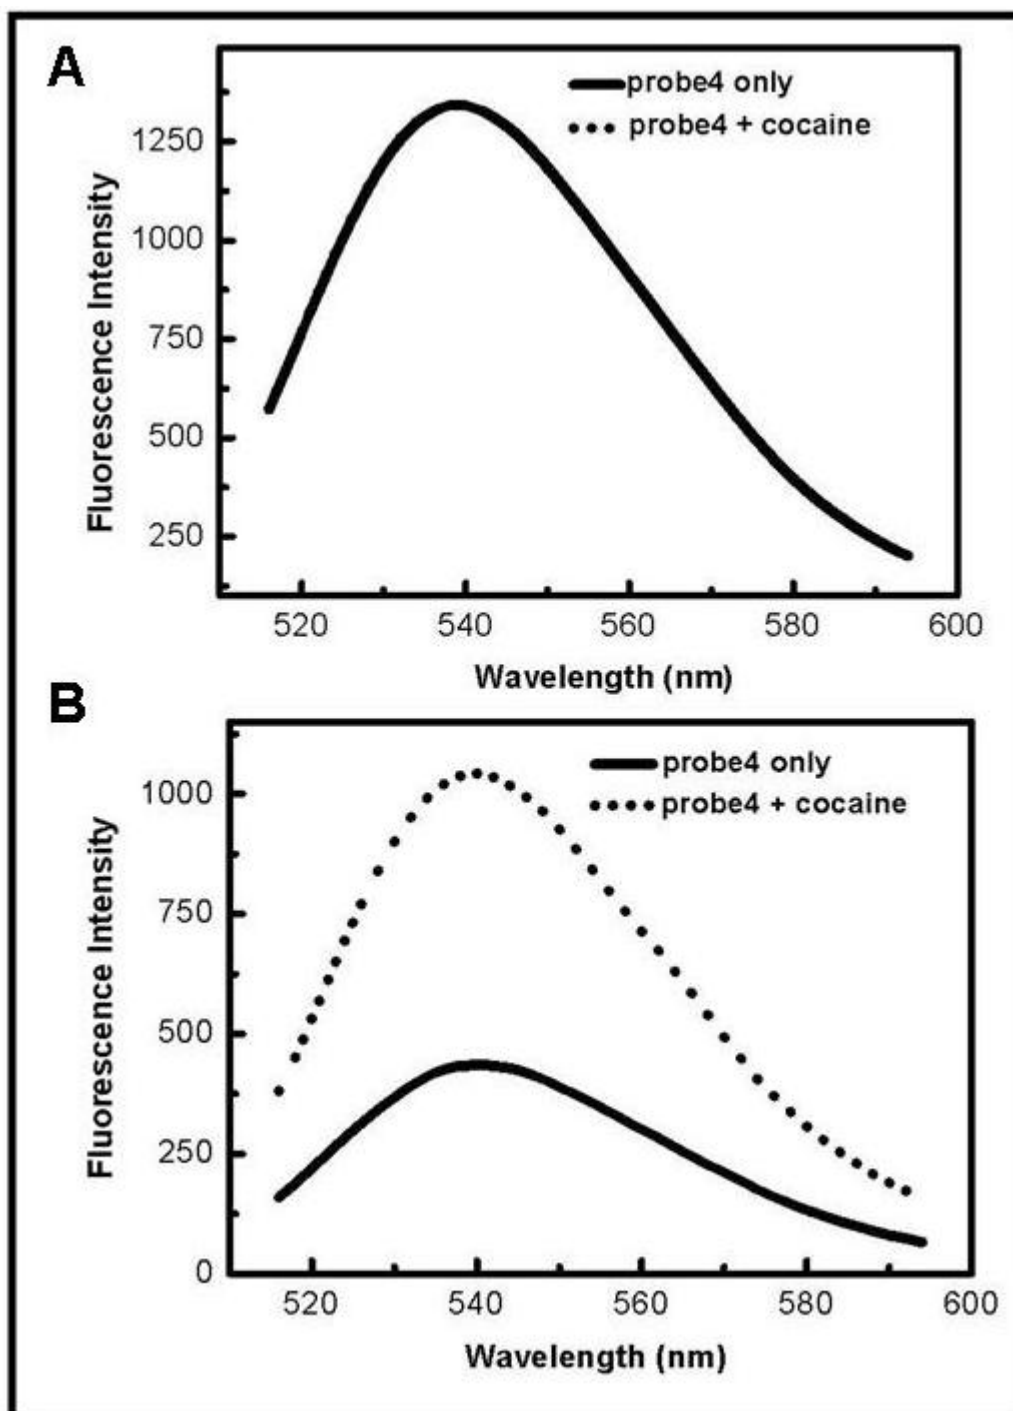

**Figure S-5.** General applicability of the detection strategy for cocaine detection: The fluorescence spectra of SYBR Gold/probe 4 mixture with or without 500  $\mu$ M cocaine, without (A) or with (B) the Exo I digestion involved. The solid line and the dotted line were overlapped with each other in A.

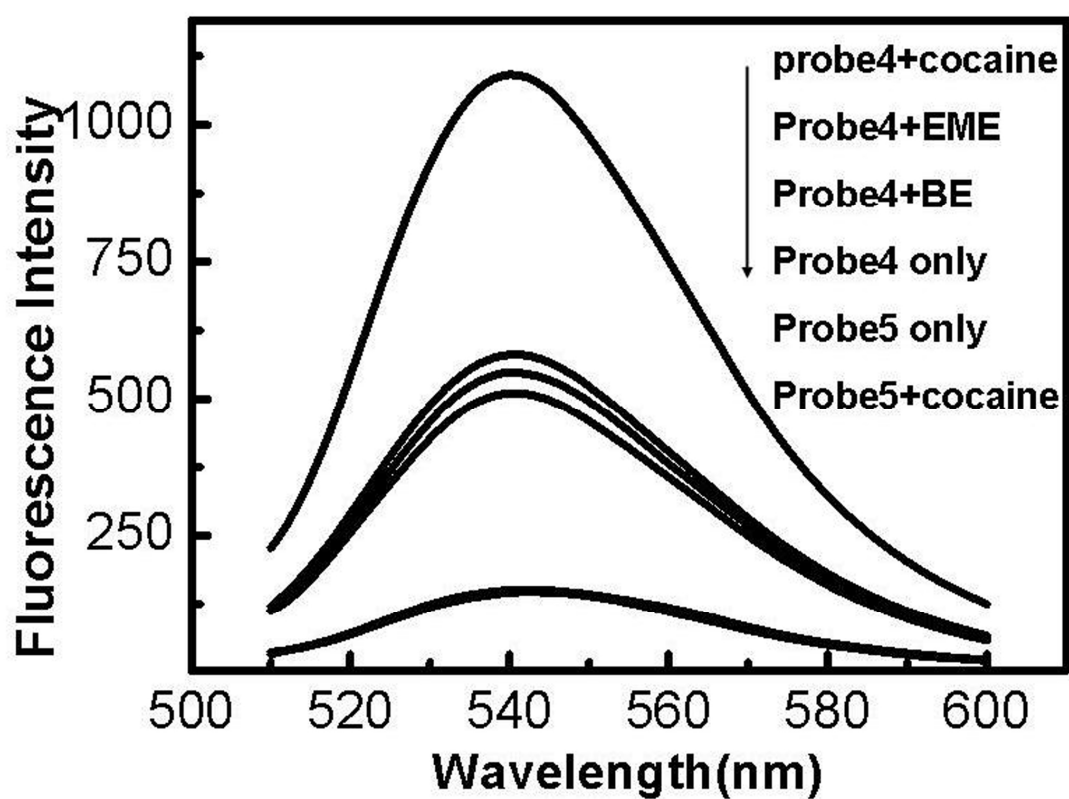

**Figure S-6.** The fluorescence spectra from solutions containing SYBR Gold, Exo I , different targets, and different probes. All assay conditions were as same as those described in the main text for cocaine detection. EME (ecgonine methyl ester) and BE (benzoyl ecgonine ) are all cocaine analogues.



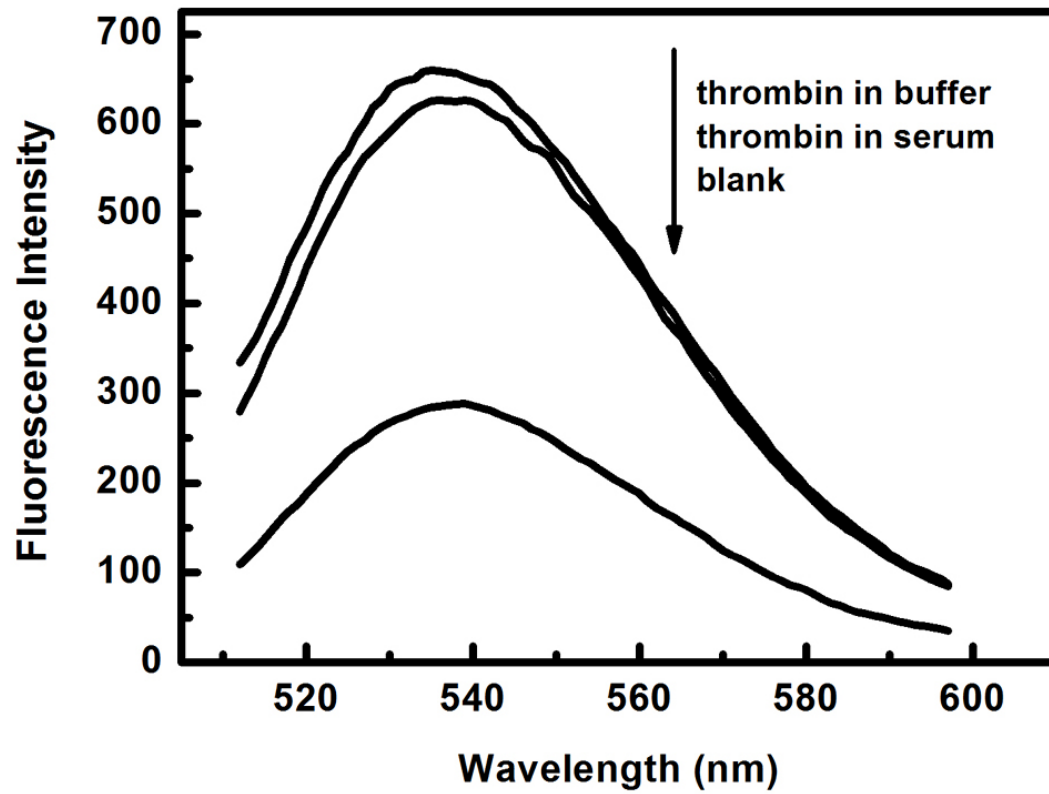

**Figure S-7.** The fluorescence spectra from solutions without or with 680 nM thrombin in buffer or in serum. All assay conditions were described in the main text.
